# Supplementary material
Source: publisher figshare collection journal article supplement (https://frontiersin.figshare.com/ndownloader/files/31947086)
Supplement: Supplementary file 1 [file 31947086]

Fig. 20 Comparison of relative permeability under different wettability conditions

Fig. 21 Comparison of capillary force curves under different wettability conditions

Fig. 22 Comparison of relative permeability in different water cut stages

Fig. 23 Comparison of capillary force curves at different water cut stages

Fig. 24 Effect of irregular porous media during the macroscopic mass transfer process.
